# Supplementary material
Source: PubMed Central journal article supplement (PMC1859950)
Supplement: pnas_0606234103_1.pdf [file pnas_0606234103_1.pdf]

**Table 2. Primary Antibodies**

| <b>Antigen</b> | <b>Type</b>       | <b>Antibody Dilution</b> |                   |                        |
|----------------|-------------------|--------------------------|-------------------|------------------------|
|                |                   | <b>IHC*</b>              | <b>Immunoblot</b> | <b>Source</b>          |
| C5             | Rabbit Polyclonal | n/a                      | 1:1000            | Dako, Carpinteria, CA  |
| C5b-9          | Mouse monoclonal  | 1:250                    | n/a               | Dako, Carpinteria, CA  |
| CFH            | Goat Polyclonal   | 1:1000                   | 1:5000            | ART, Quebec, Canada    |
| CFH            | Goat Polyclonal   | 1:500                    | n/a               | Quidell, San Diego, CA |
| CRP            | Rabbit Polyclonal | 1:200                    | 1:2000            | Dako, Carpinteria, CA  |
| SAP            | Rabbit Polyclonal | 1:500                    | n/a               | Dako, Carpinteria, CA  |
| Albumin        | Rabbit Polyclonal | 1:100                    | n/a               | Dako, Carpinteria, CA  |
| Haptoglobin    | Rabbit Polyclonal | 1:500                    | n/a               | Sigma, St. Louis, MO   |
| HSPG-per       | Rat Monoclonal    | 1:100                    | n/a               | Chemicon, Temecula, CA |
| Adrenomedulin  | Mouse monoclonal  | 1:100                    | n/a               | AbCam, Cambridge, MA   |

\* IHC= immunohistochemistry
